# Supplementary material for: How buoyancy-driven circulations shape momentum transport within the convective boundary layer: insights from Doppler lidar
Source: Research Square preprint supplement (doi:10.21203/rs.3.rs-8602716/v1), 2026-01-20
Supplement: Supplementary file 1 [file 48c7d53b25f6601db1cf9a05.docx]

Supporting Material, accompanying the manuscript: *
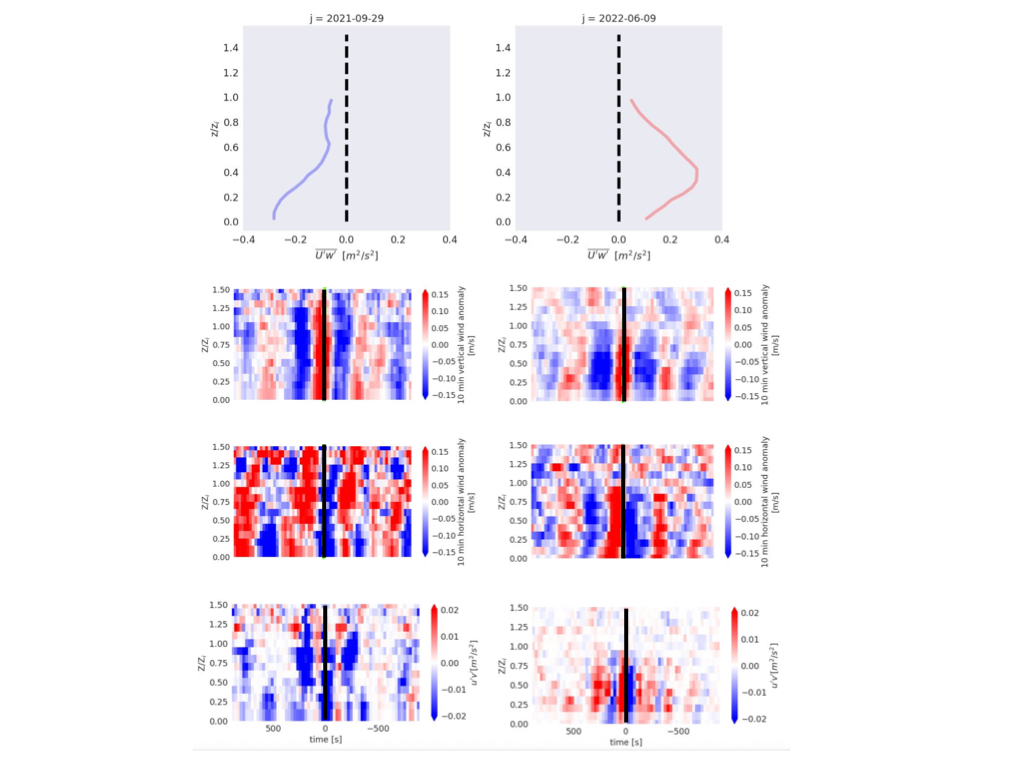
Doppler Lidar Observations of Submesoscale Flow and Momentum Flux in Convective Boundary Layers*,

*
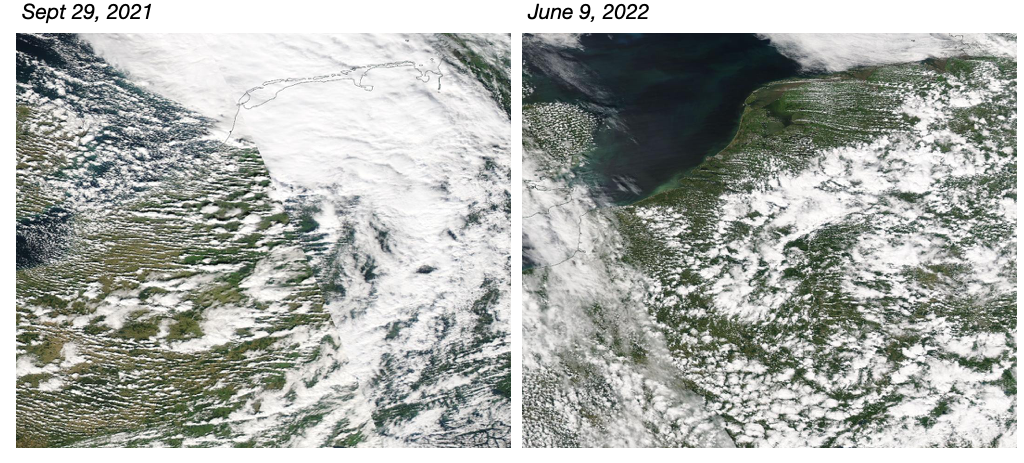
*by Nuijens and Dias Neto.
